1 **Assessment of the fatality rate and transmissibility taking account of undetected cases**  
2 **during an unprecedented COVID-19 surge in Taiwan**

3

4 **Hsiang-Yu Yuan<sup>1,2,\*</sup>, M. Pear Hossain<sup>1</sup>, Tzai-Hung Wen<sup>3</sup>, Ming-Jiuh Wang<sup>4</sup>**

5

6 <sup>1</sup> Department of Biomedical Sciences, Jockey Club College of Veterinary Medicine and Life  
7 Sciences, City University of Hong Kong, Hong Kong SAR, China

8

9 <sup>2</sup> Centre for Applied One Health Research and Policy Advice, City University of Hong Kong,  
10 Hong Kong SAR, China

11

12 <sup>3</sup> Department of Geography, National Taiwan University, Taipei City, Taiwan

13 <sup>4</sup> Department of Anesthesiology, National Taiwan University Hospital, National Taiwan  
14 University, Taiwan

15

16 \*Correspondence to: Hsiang-Yu Yuan [sean.yuan@cityu.edu.hk](mailto:sean.yuan@cityu.edu.hk)

17 Hsiang-Yu Yuan and M. Pear Hossain contributed equally to this article.

18

19

20

21 **Abstract**

22 Background

23 During the COVID-19 outbreak in Taiwan between May 11 and June 20, 2021, the observed  
24 fatality rate (FR) was 5.3%, higher than the global average at 2.1%. The high number of  
25 reported deaths suggests that hospital capacity was insufficient. However, many unexplained  
26 deaths were subsequently identified as cases, indicating that there were a few undetected cases,  
27 hence resulting in a higher estimate of FR. Estimating the number of total infected cases or  
28 knowing how to reduce the undetected cases can allow an accurate estimation of the fatality  
29 rate (FR) and effective reproduction number ( $R_t$ ).

30 Methods

31 After adjusting for reporting delays, we estimated the number of undetected cases using  
32 reported deaths that were and were not previously detected. The daily FR and  $R_t$  were  
33 calculated using the number of total cases (i.e. including undetected cases). A logistic  
34 regression model was developed to predict the detection ratio among deaths using selected  
35 predictors from daily testing and tracing data.

36 Results

37 The estimated true daily case number at the peak of the outbreak on May 22 was 897, which  
38 was 24.3% higher than the reported number, but the difference became less than 4% on June 9  
39 and afterward. After taking account of undetected cases, our estimated mean FR (4.7%) was  
40 still high but the daily rate showed a large decrease from 6.5% on May 19 to 2.8% on June 6.  
41  $R_t$  reached a maximum value of 6.4 on May 11, compared to 6.0 estimated using the reported  
42 case number. The decreasing proportion of undetected cases was associated with the increases  
43 in the ratio of the number of tests conducted to reported cases, and the proportion of cases that  
44 are contact-traced before symptom onset.

45 Conclusions

46 Increasing testing capacity and tracing efficiency can lead to a reduction of hidden cases and  
47 hence improvement in epidemiological parameter estimation.

48

## 49 Introduction

50 Knowing the actual number of coronavirus disease 2019 (COVID-19) cases throughout an  
51 outbreak is critical to provide an accurate estimate of epidemiological parameters such as the  
52 fatality rate (FR) and effective reproduction number ( $R_t$ ). These parameters aid in making  
53 proper public health decisions, assessing health care system performance, and predicting the  
54 trend of COVID-19 spread. However, the number of undetected cases can be large and may  
55 vary during an outbreak. Limited capacities for contact tracing and testing often result in  
56 underestimation of true infections <sup>1,2</sup>. The proportion of undetected cases may reduce after such  
57 capacities improve. Hence, estimating this constantly changing proportion of undetected cases  
58 throughout an outbreak is important.

59 After several months of zero confirmed community-acquired cases, quarantine exemption for  
60 flight crews, and super spreader events in tea parlors in Wanhua in Taipei in late April and  
61 early May 2021, triggered a fresh wave of local spread of the Alpha variant <sup>3</sup>. This resulted in  
62 14,005 total reported cases between May 11 and June 20, 2021 <sup>4</sup>. Approximately 5% of cases  
63 resulted in death, which was a higher case fatality rate (CFR) compared to the global rate  
64 (obtained by dividing the total number of deaths by the total number of cases worldwide),  
65 which has been consistently below 2.5% since November 16, 2020 <sup>5</sup>. Whether this high CFR  
66 was mainly because of insufficient hospital capacity and treatment, or a massive proportion of  
67 undetected cases was unknown.

68 Early in the outbreak, testing capacity was insufficient to cope with the rising cases among  
69 initial transmission clusters. The daily number of new cases grew to more than 200 within a  
70 week and continued to increase until reaching a plateau at the end of May 2021 (i.e., 596 cases  
71 on average per day from May 22 to 28). Because of the emerging outbreak, Taiwan had been  
72 under Level 2 alert since May 11, 2021 <sup>6</sup>, followed by escalation to Level 3 restrictions on May  
73 19, 2021 <sup>7</sup>, under which people are required to wear masks outdoors, gatherings of more than  
74 four people indoors and more than nine people outdoors are banned, and all schools are closed.  
75 Social distancing measures reduced individual mobility <sup>8</sup> and effectively lowered  $R_t$ . At the  
76 same time, the daily number of tests conducted continued to increase, presumably allowing  
77 more cases to be identified.

78 During the outbreak, many confirmed cases failed to be detected when alive but were tested  
79 because of their death, indicating that a certain number of undetected cases existed. The number  
80 of undetected cases who eventually died (referred to as **undetected deaths**), together with the

81 number of deaths who were known to have COVID-19 (referred to as **detected deaths**), can  
82 be used to infer the proportion of undetected cases if their fatality rates are known. Presumably,  
83 the probability of death among undetected cases is similar to that among detected cases during  
84 the early period of the outbreak when hospital capacity and treatment is not sufficient.

85 Although knowing the numbers of detected and undetected deaths helps to estimate the  
86 proportion of undetected cases and hence to guide interventions, a challenge exists that many  
87 deaths from infection usually happen several weeks after symptom onset. This highlights the  
88 importance of early estimation of the true number of total cases without delay. Hence, it is  
89 important to know whether the changes in the proportion of detected deaths can be predicted  
90 by daily testing and tracing data.

91 We quantified time-varying FR and  $R_t$  by taking into account the proportion of undetected  
92 cases estimated using death data. We then developed a model based on logistic regression to  
93 predict the proportion of undetected cases using daily data related to testing and tracing  
94 capacity.

## 95 **Methods**

### 96 ***Data sources***

97 We collected the date of symptom onset time and testing date for each reported death of  
98 COVID-19 from May 28 to July 22, 2021 from Taiwan Centers for Disease Control <sup>9</sup>. The  
99 daily number of deaths reported before May 28 was obtained from the media. Daily number of  
100 confirmed cases was collected from Taiwan National Infectious Disease Statistics System <sup>4</sup>.  
101 We collected the daily number of tests conducted from the Government Information Open  
102 Platform, Taiwan <sup>10,11</sup>.

### 103 ***Estimating true total cases and fatality rate***

104 Deaths from COVID-19 were classified into two categories, detected and undetected deaths,  
105 depending on whether testing was performed before the death or not, respectively (see the  
106 schema in Figure 1A). To estimate the number of true total cases, we first considered the  
107 following ratio of undetected to detected deaths using the numbers of detected and undetected  
108 cases and their respective FR:

$$109 \quad \frac{d_{ud}(t)}{d_d(t)} = \frac{c_{ud}(t) \times FR_{ud}}{c_d(t) \times FR_d(t)} \quad (1)$$

110 where  $d_d$  refers to the number of detected deaths, while  $d_{ud}$  refers to the number of undetected  
111 deaths;  $c_d(t)$  and  $c_{ud}(t)$  represent the number of cases that are detected and undetected at day  
112  $t$ , respectively. Note that  $t$  refers to the reporting date for detected cases or detected deaths;  
113 For undetected cases or undetected deaths,  $t$  refers to the adjusted reporting date such that the  
114 reporting delay (i.e., the time elapsed between symptom onset and reporting) is adjusted to be  
115 the same as that of detected cases. Thus,  $d_d(t)$  represents the number of deaths among the  
116 detected cases who are reported at day  $t$ . Similarly,  $d_{ud}(t)$  is the number of deaths among the  
117 undetected cases whose adjusted reporting date is at day  $t$ .  $FR_d(t)$ , which is likely to be  
118 affected by the change in hospital capacity or treatment, represents the daily FR among the  
119 detected cases at day  $t$ .  $FR_{ud}$  represents the FR among the undetected cases.  $FR_{ud}$  was  
120 assumed to be a constant, estimated as the average  $FR_d(t)$  during the initial two weeks (from  
121 May 11 to May 24) of the outbreak when the hospital capacity or treatment was not sufficient.  
122 Undetected deaths who are tested later are identified as “late-detected” cases ( $c_{ld}$ ) (See Figure  
123 1A). We back-projected the number of late-detected cases from their late reporting time to their  
124 adjusted reporting date  $t$  <sup>12</sup>, using the mean and standard deviation of the reporting delay

125 among detected cases. Our aim was to estimate  $c_{ud}(t)$ . After rearrangement, the following  
126 formula was derived:

$$127 \quad c_{ud}(t) = c_d(t) \times \frac{FR_d(t)}{FR_{ud}} / \frac{d_d(t)}{d_{ud}(t)} \quad (2)$$

128 The value can be solved because all of the terms on the right are either known or can be  
129 estimated. We assumed that most of the undetected deaths were identified as “late-detected”  
130 cases ( $c_{ld}$ ). Therefore, the number of undetected deaths was approximated by the number of  
131 late-detected cases ( $d_{ud} \approx c_{ld}$ ) and then the ratio  $\frac{d_d(t)}{d_{ud}(t)}$  was obtained. At the same time, the  
132 proportion of detected deaths (i.e., the detection ratio among death cases;  $\frac{d_d(t)}{d_d(t)+d_{ud}(t)}$ ) was also  
133 calculated. Finally, the true number of total cases was derived empirically as the sum of  
134 detected and undetected cases (i.e.,  $c_d + c_{ud}$ ). Note that these ratios among deaths were also  
135 predicted by a regression model using data related to testing and tracing and hence a model-  
136 predicted number of total cases was obtained (see later sections).

137 The FRs of reported cases (including both detected and late-detected cases;  $c_d + c_{ld}$ ) and total  
138 cases were estimated at the reporting time (or the adjusted reporting time for undetected cases)  
139 using the following equations.

$$140 \quad FR_{reported}(t) = \left( \frac{d_d(t) + c_{ld}(t)}{c_d(t) + c_{ld}(t)} \right) \quad (3)$$

$$141 \quad FR_{total}(t) = \left( \frac{d_d(t) + d_{ud}(t)}{c_d(t) + c_{ud}(t)} \right) \quad (4)$$

142  $FR_{reported}$  is commonly known as the case fatality rate, and  $FR_{total}$  is the infection fatality  
143 rate.

#### 144 *Estimating the proportion of detected deaths using a predictive model*

145 We predicted the detection ratio among death cases using daily values of five indicators related  
146 to testing, tracing, and hospital capacities as candidate predictors. These indicators are: the  
147 *proportion of cases without contact tracing delay, ratio of the number of tests conducted to*  
148 *reported cases, testing delay, reporting delay and death delay* (for definitions, see **Error!**  
149 **Reference source not found.**). We calculated the delay periods in testing, reporting and death  
150 by subtracting adjusting for the date of symptom onset from the dates of these three events.  
151 Testing (the first test) earlier or on the same day as symptom onset implied that cases were

152 contact-traced without delay. If cases were tested after symptom onset, they were either  
153 contact-traced with delay or were not contact-traced. The proportion of death cases that were  
154 contact-traced without delay was calculated.

155 To investigate the factors that influence the proportion of detected deaths, we developed a  
156 logistic regression model. We assumed that the number of deaths that were previously detected  
157 on day  $t$  follows a binomial distribution, i.e.  $d_d(t) \sim \text{binomial}(d(t), m(t))$ , where  $m(t) =$   
158  $\frac{d_d(t)}{d_d(t) + a_{ud}(t)}$  is the expected proportion of detected deaths on day  $t$ .

159 The full predictive model is:

$$160 \quad \log\left(\frac{m(t)}{1 - m(t)}\right) = \alpha + \beta_1 R_{tc} + \beta_2 P_{ntd} + \beta_3 C_d + \beta_4 T_d + \beta_5 D_d \quad (5)$$

161 where  $R_{tc}$  is the daily ratio of tests conducted to reported cases;  $P_{ntd}$  represents the daily  
162 proportion of cases (among detected deaths) without contact tracing delay.  $C_d$ ,  $T_d$  and  $D_d$  are  
163 daily reporting, testing and death delays, respectively.  $\alpha$  is the intercept and  $\beta_i$  is the regression  
164 coefficient of each covariate. The proportion of undetected COVID-19 cases can be calculated  
165 using equations (1) and (5) after  $m(t)$  is estimated:

$$166 \quad \frac{c_{ud}(t)}{c_{ud}(t) + c_d(t)} = 1 / \left( 1 + \frac{m(t)}{1 - m(t)} \times \frac{FR_{ud}}{FR_d(t)} \right) \quad (6)$$

167 where  $\frac{m(t)}{1 - m(t)} = \frac{d_d(t)}{a_{ud}(t)}$  is the odds of being detected.

### 168 **Model selection**

169 To obtain the best model, the variables in equation 5 were added to the model iteratively. First,  
170 model fit was measured for each of the variables separately using the Akaike information  
171 criterion (AIC) <sup>13</sup>. The model containing the lowest AIC value was selected as the best model  
172 candidate in this batch. Next, we added one additional variable to the candidate model from  
173 the remaining four variables in the next batch. Among the two-variable models, the model with  
174 the lowest AIC value was selected as the best model candidate again. We obtained the best  
175 model candidates among three-variable, four-variable and full models. The final best model  
176 was obtained by comparing the best model candidates in different batches with the lowest AIC.

### 177 **Model validation**

178 To evaluate whether the predictive model achieved its intended purpose (i.e., to improve the  
179 accuracy of epidemiological parameter estimation), we explored the relationship between  $R_t$

180 estimated from the total cases predicted by the best model and daily mobility data. Cases  
181 were back-projected to infection time. The result was compared with  $R_t$  estimated using total  
182 cases that were empirically derived or using reported cases.  $R_t$  estimated from four scenarios  
183 of infections were compared:

184 **Scenario 1 (S1): Total cases (at infection time) estimated using an empirical detection**  
185 **ratio** – These cases include both the reported and undetected cases at their infection time. The  
186 number of undetected cases was estimated empirically assuming reporting delay was the same  
187 for detected and undetected cases.

188 **Scenario 2 (S2): Total cases (at infection time) estimated from a model-predicted**  
189 **detection ratio** – These cases include both the reported and undetected cases at their infection  
190 time. The number of undetected cases was estimated from the model assuming reporting delay  
191 was the same for detected and undetected cases.

192 **Scenario 3 (S3): Reported cases (at infection time)** – Cases that were detected before death  
193 and late-detected after death at their infection time.

194 **Scenario 4 (S4): Reported cases (at reporting time)** – Cases that were detected before death  
195 and late-detected after death at their reporting time. Late-detected cases were back-projected  
196 at the adjusted reporting time.

### 197 *Estimating the effective reproduction number*

198 The effective reproduction number  $R_t$  was estimated from the daily new cases of infection  
199 using the statistical package *EpiEstim*<sup>14</sup>. To estimate the daily number of new cases, we  
200 assumed that both the incubation time and reporting delay followed gamma distribution<sup>15,16</sup>.  
201 The mean incubation time for the circulated strain in Taiwan was 3.53 days<sup>17</sup>, and we estimated  
202 the mean reporting delay as 4.45 days. Assuming the standard deviations were equal for both  
203 the distributions (estimated as 3.93 days for the reporting delay), the distribution of time  
204 between infection and reporting was gamma distribution with a mean of 7.98 days and a  
205 standard deviation of 5.28 days. The mean of the distribution was estimated as the sum of mean  
206 incubation time and confirmation delay. In contrast, the standard deviation was obtained from  
207 weighted means and pooled standard deviation for the period between infection and reporting  
208 using the following formula:

$$209 \quad sd_{gamma} = sd_{pooled} \sqrt{\left(\frac{m_1 + m_2}{m_w}\right)} \quad (7)$$

210 where,  $m_1$  and  $m_2$  are mean incubation time and confirmation delay and  $m_w$  refers weighted  
211 mean of these two.  $sd_{pooled}$  represents the pooled standard deviation for the period between  
212 infection and reporting.



213 We then estimated total cases at infection time using the empirical detection ratio (S1) and the  
214 model-predicted detection ratio (S2), and reported cases at infection time (S3) using a back-  
215 projection method <sup>12</sup>.

216 We set initial conditions for estimating  $R_t$ . Before May 11, we assumed that there were 15  
217 cases each day between May 6 and 10, which was the average number of reported cases at  
218 infection time during this 5-day period.

## 219 **Results**

220 Time-varying FR among true total cases (equation 4) was first quantified after taking into  
221 account undetected cases and was compared with that of reported cases. The number of total  
222 cases was also predicted using polymerase chain reaction (PCR) testing data (equations 5 and  
223 6). To assess the impact of including undetected cases, we investigated the relationship between  
224  $R_t$  generated using total cases and mobility data and then determined whether the relationship  
225 improved, compared with  $R_t$  from reported cases.

226 After the number of undetected cases was considered, the estimated FR was lower than using  
227 reported cases but was still high during the initial period of the outbreak. The mean FR of total  
228 cases was estimated to be 4.7%, which was lower than the mean FR of 5.3% for reported cases  
229 ([Figure 1B](#)). The FR increased rapidly from 4.7% and peaked at 6.5% on May 19, but then  
230 continued decreasing, reaching 2.8% on June 6. Since then, the rate was generally maintained.

231 From May 24 to June 3, the 5-day moving average numbers of reported cases reached a plateau  
232 and then declined thereafter ([Figure 3A](#)). The estimated true daily case number at the peak of  
233 the outbreak on May 22 was 897, which was 24.3% higher than the reported number. The  
234 difference became less than 4% on June 9 and afterward.

235 Until June 20, a total of 105 late-detected cases were reported, indicating many undetected  
236 deaths. Similarly, daily detected deaths also reached a plateau around May 24 ([Figure 3B](#)).  
237 However, the number of late-detected cases (at adjusted reporting time), reached a peak (7  
238 persons per day) on May 21 and started to decline immediately, approaching zero after June 8.  
239 This indicated the improvement of the detected ratio among deaths. The detection ratio among  
240 deaths, which was about 50% initially, exceeded 95% after the end of May ([Figure S1B](#)). This  
241 ratio was very different from the observed ratio (a V-shaped pattern) without back-projection  
242 ([Figure S1A](#)).

### 243 ***Predicting detection ratio using testing data***

244 We next investigated whether the improvement in the proportion of detected cases was related  
245 to the improved capacity of testing and tracing. The indicators of the capacity were explained  
246 by the schematic of individual infection and testing statuses of each case among deaths (for  
247 definitions, please refer to [Figure 2](#) and its legend). Depending on the time of testing, the case  
248 can be categorized as a detected death (contact-traced without delay or tested after symptom  
249 onset but before death) or an undetected death (tested after death). More efficient contact

250 tracing allowed more cases to be traced and tested before symptom onset and was indicated by  
251 the *proportion of cases without contact tracing delay*. This proportion fluctuated between 25%  
252 and 75% throughout the study period, with an increasing trend from late May (below 50%) to  
253 late June (above 60%) ([Figure 4A](#)). The *testing delay* gradually increased, from approximately  
254 two days to up to 4–6 days, until June 14, a few weeks after the outbreak started to decline  
255 ([Figure 4B](#)). The *reporting delay* from the day of symptom onset ranged mostly between 2.5  
256 and 7.5 days ([Figure 4E](#)), whereas the *death delay* continued increasing from 5 days to more  
257 than 18 days ([Figure 4C](#)). The *ratio of the number of tests conducted to reported cases*  
258 increased from less than 50 to more than 200 ([Figure 4D](#)), demonstrating the improvement in  
259 testing capacity throughout the outbreak.

260 We compared models starting from the most basic to more complex ones by their AIC values  
261 to identify the best-fitting model. The model with the predictor, i.e., the proportion of cases  
262 without contact tracing delay and the ratio of tests conducted to reported cases, was selected as  
263 the best model (Model 2 in [Table 1](#)).

264 The model successfully captured the trend in the proportion of detected deaths ([Figure 4F](#)). 20  
265 out of 34 daily values were successfully predicted within the confidence interval. Among the  
266 values outside the interval, most of the them were in the near distance; only two dots have  
267 errors larger than two times the intervals.

268 The results suggest that a higher detection ratio among deaths was driven by more cases who  
269 were contact-traced without delay and a higher number of tests conducted relative to the  
270 number of cases ([Table 2](#)).

### 271 *Comparing effective reproduction number and mobility index*

272 Comparisons were made between  $R_t$  estimated using i) total cases that were estimated using  
273 the empirical detection ratio; ii) total cases that were estimated from the model-predicted  
274 detection ratio using testing data; and iii) reported cases only (see [Figure 5A, B](#), [Figure S2](#) and  
275 Methods). When the total case number was used,  $R_t$  was higher during the earlier dates. The  
276 number reached a maximum value of 6.4 on May 11, compared to 6.0 estimated using the  
277 reported case number. We further evaluated the relationship between  $R_t$  and mobility data  
278 during the period when  $R_t$  reduced from the maximum value to 1 (May 11 to May 24) ([Table](#)  
279 [S1](#)). We found that when the total case number was used (either estimated using the empirical  
280 detection ratio or predicted using the testing data), a lower AIC was produced, indicating a  
281 better fit to the mobility data.

282 In summary, efficiencies of testing and contact tracing changed during the outbreak and were  
283 useful in predicting the proportion of undetected cases. After adding the undetected cases, a  
284 better estimate of  $R_t$  was made and a reduction in the FR was observed.

## 285 Discussion

286 Understanding whether a high FR observed in the recent largest COVID-19 outbreak in Taiwan  
287 was attributed to a higher number of undetected cases or insufficient health care capacity is  
288 important to guide interventions to reduce COVID-19 mortality in the future. An important  
289 observation is that even though the proportion of undetected cases was included, the average  
290 FR was only adjusted to 4.7% from 5.3%, which is still higher than the global average for the  
291 same time (i.e., 2.1% in May and June 2021<sup>5</sup>). However, the daily FR reduced to 2.8% on June  
292 6 and remained at this low level, similar to that in the United States (i.e., 2.8% in May and June  
293 2021<sup>18</sup>). The reduction from the initially high FR can be explained by the improvement in  
294 hospital capacity or treatment to accommodate the sudden rise in cases. This is supported by  
295 the observation that the duration between symptom onset and death among detected deaths  
296 continued increasing from approximately five days to more than two weeks in June.

297 The number of hidden (undetected) COVID-19 cases often affects the estimation of  
298 transmissibility of the virus and the effectiveness of non-pharmaceutical interventions (NPIs)  
299 implemented. Even though the effects of contact tracing and testing on transmissibility have  
300 been studied<sup>19,20</sup>, how many hidden cases do they cause is unclear. We demonstrated that the  
301 time-varying detection ratios can be predicted using data on testing and contact tracing. As a  
302 result, a more accurate  $R_t$  can be obtained, which is likely to be explained by mobility data  
303 better. The guidance for implementing NPIs based on changes in mobility can be provided<sup>8</sup>.

304 We found that the ratio of the number of tests conducted to reported cases, and the proportion  
305 of cases that are contact traced without delay can be used to “nowcast” the proportion of  
306 undetected cases. Because the number of tested samples can quickly reach the capacity limit  
307 when the case number is growing, many samples remain untested. Hence, each day, the number  
308 of confirmed cases depends largely on how many tests can be performed. A day delay in testing  
309 and confirming a case, leads to a day delay in tracing the close contacts of the case. Further  
310 more, a higher contact tracing coverage together with a shorter delay of being traced enables  
311 more cases to be identified earlier<sup>19,20</sup>. These suggest increasing testing and tracing capacity to  
312 identify those infections earlier can reduce hidden cases more.

313 Modelling has been used to estimate the proportion of undetected COVID-19 cases using the  
314 observed case number during a specific period (e.g., before or after an intervention) of an  
315 outbreak<sup>21,22</sup>. More recently, an approach through estimating under-ascertainment by directly  
316 comparing model-predicted death with excess deaths recorded was used<sup>23</sup>. We checked the

317 number of deaths related to flu and pneumonia illness <sup>9</sup> and found no unusual excess deaths  
318 other than the reported COVID-19 deaths during this period. The proportion of undetected  
319 cases can also be calculated after incorporating seroprevalence data with false negative rates  
320 of tests into models <sup>24</sup>. Overall, none of these methods estimate the constantly changing  
321 proportion of undetected cases.

322 Several criteria enabled us to make successful prediction using testing data. First, the number  
323 of deaths should be high. If this number is low, the uncertainty of estimating the number of  
324 undetected cases becomes high. Second, most of the deaths have to be tested eventually.  
325 Taiwan government has a strong directive to test all sudden death cases; for example, on June  
326 18, it was announced that PCR tests would be performed for all sudden and unexplained deaths  
327 <sup>25</sup>. This may not likely be the case in countries with a large number of excess deaths associated  
328 with COVID-19.

329 In summary, predicting the number of undetected cases as early as possible using testing data  
330 can help obtain an  $R_t$  with a better relationship with mobility data, thus enabling policymakers  
331 to make timely public health decisions using mobility information to contain the outbreak.

### 332 **Acknowledgement**

333 The authors are indebted to City University of Hong Kong for providing excellent research  
334 facilities. The authors also acknowledge support from grants funded by Health and Medical  
335 Research Fund [COVID190215] and City University of Hong Kong [7200573 and 9610416].

336 **References**

- 337 1. Grassly, N. C., Pons-Salort, M., Parker, E. P. K., White, P. J. & Ferguson, N. M.  
338 Comparison of molecular testing strategies for COVID-19 control: a mathematical  
339 modelling study. *Lancet Infect. Dis.* **20**, (2020).
- 340 2. Contreras, S. *et al.* The challenges of containing SARS-CoV-2 via test-trace-and-isolate.  
341 *Nat. Commun.* **12**, 1–13 (2021).
- 342 3. Tan, Y. COVID-19: What went wrong in Singapore and Taiwan? - BBC News. *BBC*  
343 *News* <https://www.bbc.com/news/world-asia-57153195> (2021).
- 344 4. Taiwan National Infectious Disease Statistics System. Severe Pneumonia with Novel  
345 Pathogens (COVID-19). <https://nidss.cdc.gov.tw/en/nndss/disease?id=19CoV> (2021).
- 346 5. Our World in Data. Coronavirus (COVID-19) Deaths - Statistics and Research.  
347 <https://ourworldindata.org/covid-deaths> (2021).
- 348 6. Taiwan Centers for Disease Control. CECC raises epidemic warning to Level 2 and  
349 implements related restrictions and measures, effective from May 11 to June 8, in  
350 response to increased risk of community transmission.  
351 [https://www.cdc.gov.tw/En/Bulletin/Detail/0jMlImCVWTuhO9mfQCd-](https://www.cdc.gov.tw/En/Bulletin/Detail/0jMlImCVWTuhO9mfQCd-4g?typeid=158)  
352 [4g?typeid=158](https://www.cdc.gov.tw/En/Bulletin/Detail/0jMlImCVWTuhO9mfQCd-4g?typeid=158) (2021).
- 353 7. Taiwan Centers for Disease Control. CECC raises epidemic warning to Level 3  
354 nationwide from May 19 to May 28; strengthened measures and restrictions introduced  
355 across Taiwan to reduce community transmission.  
356 [https://www.cdc.gov.tw/En/Bulletin/Detail/VN\\_6yeoBTKhRkKoSy2d0hJQ?typeid=158](https://www.cdc.gov.tw/En/Bulletin/Detail/VN_6yeoBTKhRkKoSy2d0hJQ?typeid=158)  
357 (2021).
- 358 8. Nouvellet, P. *et al.* Reduction in mobility and COVID-19 transmission. *Nat. Commun.*  
359 **12**, 1–9 (2021).
- 360 9. Taiwan Centers for Disease Control. COVID-19 (SARS-CoV-2 Infection).  
361 <https://www.cdc.gov.tw/En>.
- 362 10. Government Information Open Platform. Taiwan's COVID-19 coronavirus test daily  
363 delivery number. <https://data.gov.tw/dataset/120451> (2021).
- 364 11. Taiwan daily confirmed local case data.

- 365 [https://docs.google.com/spreadsheets/d/12tQKCRuaiBZfc9yDd6tmlOds62ke\\_4AcK](https://docs.google.com/spreadsheets/d/12tQKCRuaiBZfc9yDd6tmlOds62ke_4AcKmNJ6q4gdU/)  
366 [mNJ6q4gdU/](https://docs.google.com/spreadsheets/d/12tQKCRuaiBZfc9yDd6tmlOds62ke_4AcKmNJ6q4gdU/) (2021).
- 367 12. Becker, N. G., Watson, L. F. & Carlin, J. B. A method of non-parametric back-projection  
368 and its application to aids data. *Stat. Med.* **10**, 1527–1542 (1991).
- 369 13. Bozdogan, H. Model selection and Akaike’s Information Criterion (AIC): The general  
370 theory and its analytical extensions. *Psychometrika* **52**, 345–370 (1987).
- 371 14. Cori, A., Ferguson, N. M., Fraser, C. & Cauchemez, S. A New Framework and Software  
372 to Estimate Time-Varying Reproduction Numbers During Epidemics. *Am. J. Epidemiol.*  
373 **178**, 1505–1512 (2013).
- 374 15. Adam, D. C. *et al.* Clustering and superspreading potential of SARS-CoV-2 infections  
375 in Hong Kong. *Nat. Med.* **26**, 1714–1719 (2020).
- 376 16. Qin, J. *et al.* Estimation of incubation period distribution of COVID-19 using disease  
377 onset forward time: A novel cross-sectional and forward follow-up study. *Sci. Adv.* **6**,  
378 eabc1202 (2020).
- 379 17. Homma, Y. *et al.* The incubation period of the SARS-CoV-2 B.1.1.7 variant is shorter  
380 than that of other strains. *J. Infect.* **83**, e15–e17 (2021).
- 381 18. Worldometer. COVID-19 coronavirus pandemic.  
382 <https://www.worldometers.info/coronavirus/> (2021).
- 383 19. Kretzschmar, M. E. *et al.* Impact of delays on effectiveness of contact tracing strategies  
384 for COVID-19: a modelling study. *Lancet Public Heal.* **5**, e452–e459 (2020).
- 385 20. Kucharski, A. J. *et al.* Effectiveness of isolation, testing, contact tracing, and physical  
386 distancing on reducing transmission of SARS-CoV-2 in different settings: a  
387 mathematical modelling study. *Lancet Infect. Dis.* **20**, 1151–1160 (2020).
- 388 21. Liang, J., Yuan, H.-Y., Wu, L. & Pfeiffer, D. U. Estimating effects of intervention  
389 measures on COVID-19 outbreak in Wuhan taking account of improving diagnostic  
390 capabilities using a modelling approach. *BMC Infect. Dis.* **21**, 1–10 (2021).
- 391 22. Li, R. *et al.* Substantial undocumented infection facilitates the rapid dissemination of  
392 novel coronavirus (SARS-CoV-2). *Science* **368**, 489–493 (2020).
- 393 23. Watson, O. J. *et al.* Leveraging community mortality indicators to infer COVID-19



- 394 mortality and transmission dynamics in Damascus, Syria. *Nat. Commun.* **12**, 1–10  
395 (2021).
- 396 24. Bhattacharyya, R. *et al.* Incorporating false negative tests in epidemiological models for  
397 SARS-CoV-2 transmission and reconciling with seroprevalence estimates. *Sci. Rep.* **11**,  
398 1–14 (2021).
- 399 25. Taiwan Centers for Disease Control. Report on the Press Conference after the National  
400 Epidemic Prevention Conference on June 18-Department of Disease Control, Ministry  
401 of Health and Welfare.  
402 <https://www.cdc.gov.tw/Bulletin/Detail/j5bFJQGngMHxaaQIK-j12w?typeid=9> (2021).
- 403 26. google. COVID-19 Community Mobility Reports.  
404 <https://www.google.com/covid19/mobility/?hl=en-GB> (2021).
- 405

406 **Figures and tables**

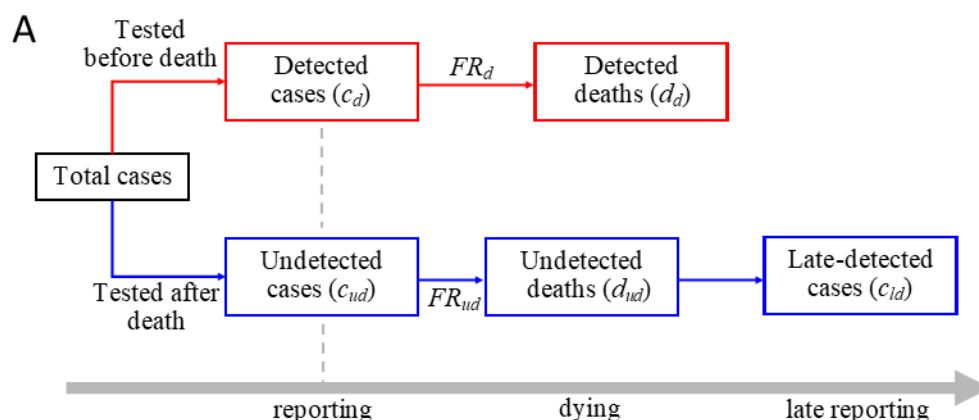

407

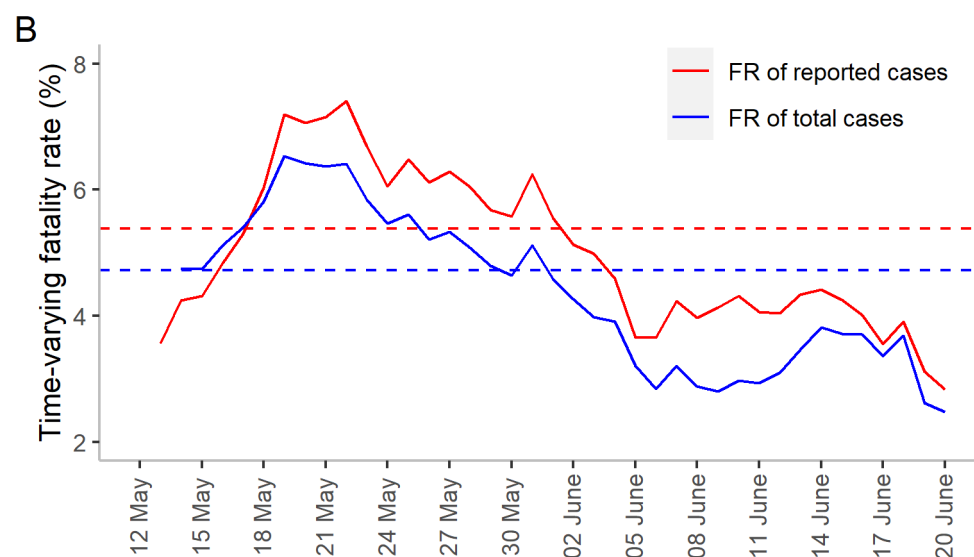

408

409 Figure 1. Types of cases and the fatality rate (FR). (A) Schema of different types of cases and  
 410 deaths in relation to their testing and death time. At the time of reporting detected cases, the  
 411 number of undetected cases is estimated using Eq. (2) (see Methods).  $FR_d$  is the FR among  
 412 detected cases, and  $FR_{ud}$  is the FR among undetected cases. Reported cases include both  
 413 detected and late-detected cases (after undetected deaths are tested and confirmed), while total  
 414 cases include both detected and undetected cases. (B) Time-varying FRs among reported and  
 415 total cases. The solid red line represents the proportion of reported deaths (i.e., detected and  
 416 undetected deaths) among the total reported cases. The solid blue line represents the proportion  
 417 of reported deaths among the total cases. The dashed red line represents the average FR among  
 418 the reported cases (5.3%), whereas the blue dashed line shows the average FR among the total  
 419 cases (4.7%). Note that the FR of the total cases was higher than that of the reported cases in  
 420 the first few days because  $FR_{ud}$  was assumed to be same as the mean  $FR_d$  between May 11  
 421 and May 26. Data points during the earliest dates when the number of detected or undetected  
 422 cases was zero are not shown.

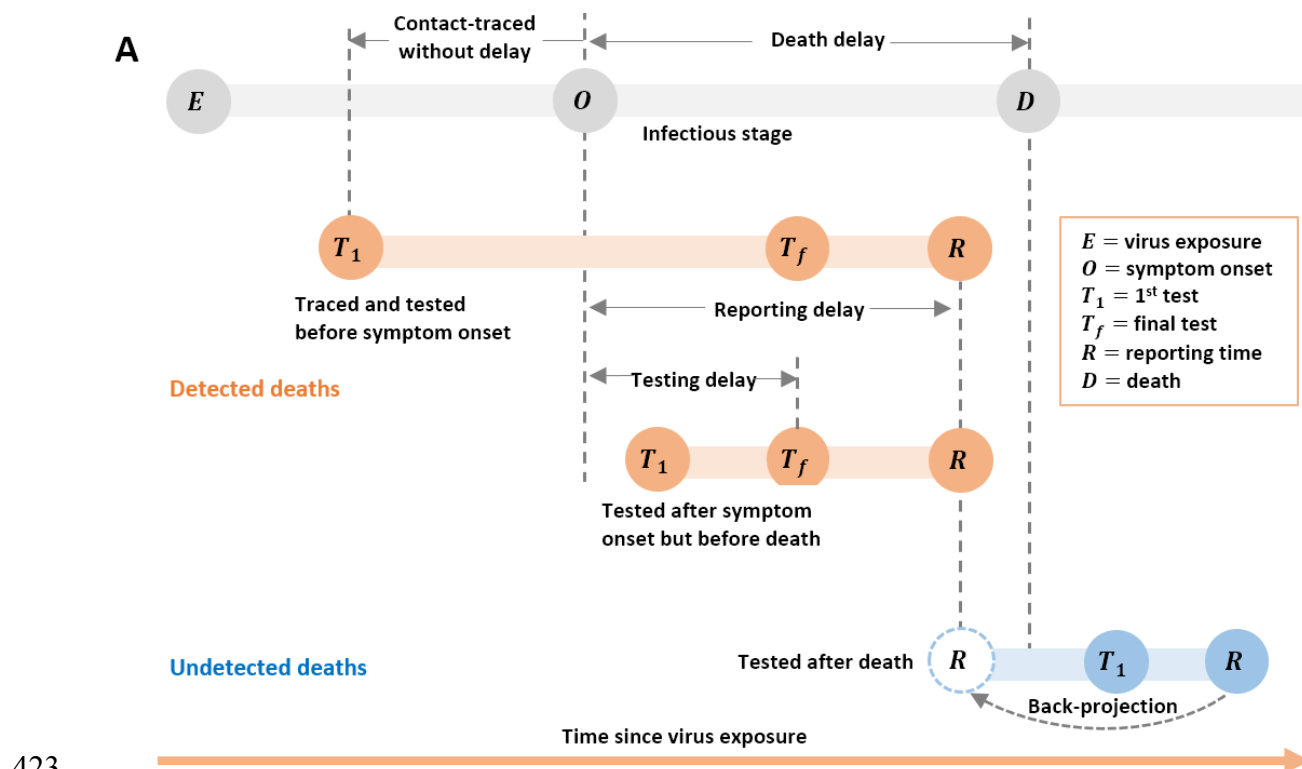

423

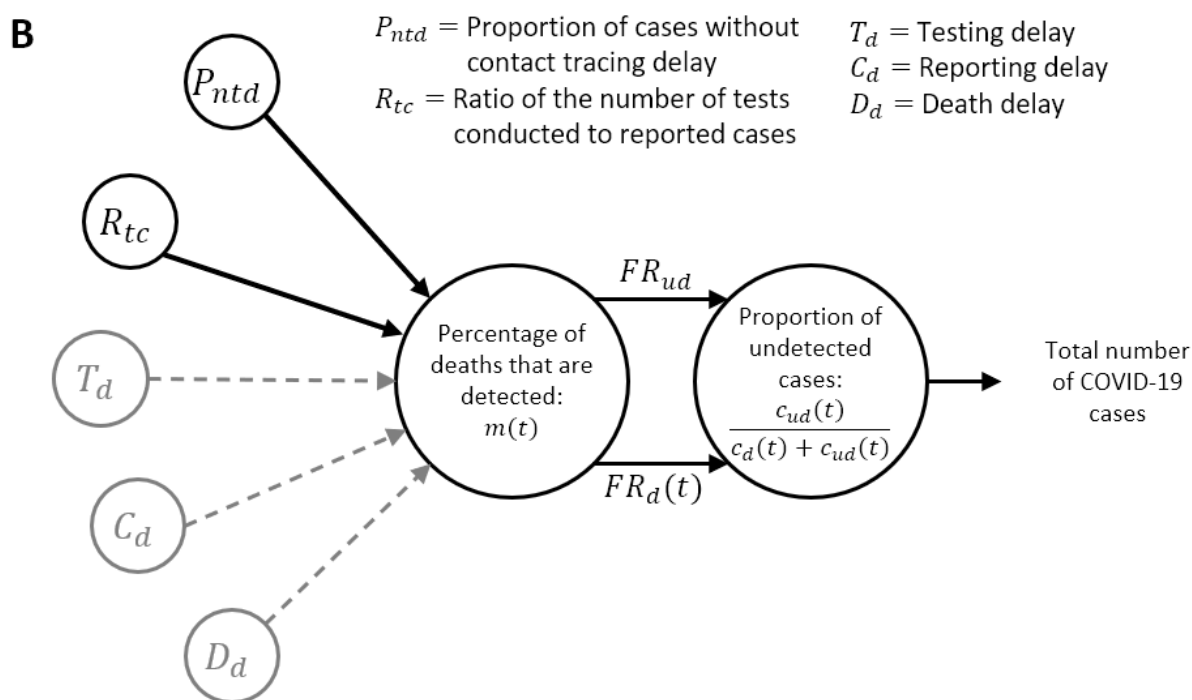

424

425 Figure 2. (A) Statuses of infection and testing of individual deaths. The gray bar represents the  
 426 infection statuses of an infected case who later died after the start of infection. Orange and blue  
 427 bars represent the flow of testing from the first test until the infected case is reported. The  
 428 infected case was categorized as *Detected* if the first testing was performed before death. A  
 429 case that was tested on the same date of or after death was categorized as *Undetected*. Among  
 430 detected cases, we assumed that a case was contact traced without delay if the first test  $T_1$  was  
 431 performed before symptom onset  $O$ ; otherwise, contact traced with delay or not contact traced  
 432 if the  $T_1$  was performed after symptom onset. Testing delay refers to the time between symptom  
 433 onset and the last test  $T_f$ . Similarly, the reporting delay and death delay are defined as the time

434 difference between symptom onset and reporting,  $R$ , and death,  $D$ , respectively. The reporting  
435 time among an undetected death was adjusted to an earlier time to have the same reporting  
436 delay as detected deaths. The definitions for each status,  $E$ ,  $O$ ,  $T_1$ ,  $T_f$ ,  $R$  and  $D$ , are listed in the  
437 text box. **(B) Estimation of total number of COVID-19 cases (sum of detected and**  
438 **undetected) using a regression model.** With the best-fitting model (see [Table 2](#)), we estimated  
439 the percentage of deaths that are detected,  $m(t)$ . Undetected proportion of cases was estimated  
440 based on the relationship between  $m(t)$  and fatality rates (see equation 6). Gray dashed lines  
441 represent the predictors that were not included in the best-fitting model while estimating  $m(t)$ .

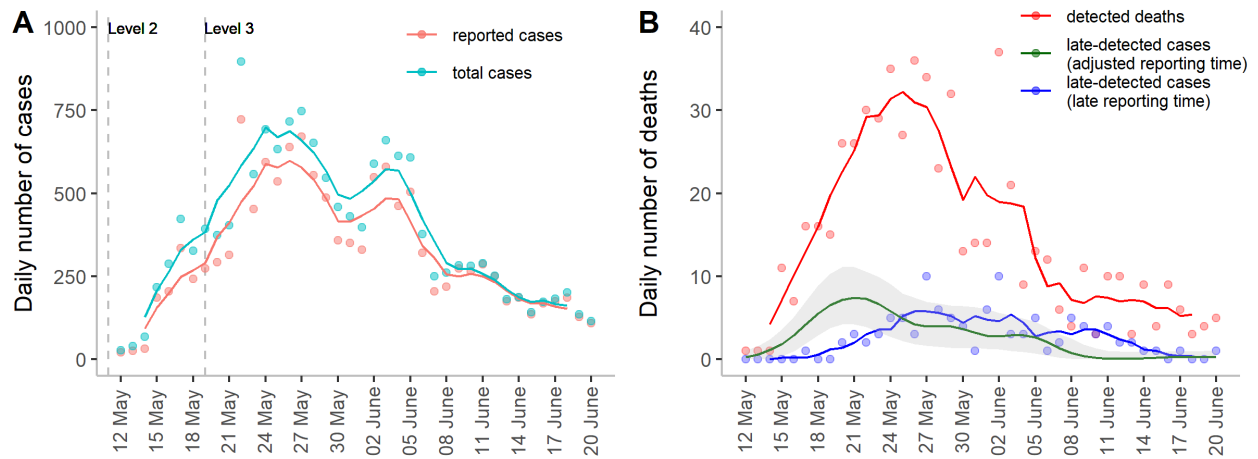

442

443 Figure 3. Daily numbers of reported, total cases and deaths. Data are plotted on their reporting  
444 date. **(A)** Daily number of cases that are reported. Daily number of total cases, including both  
445 the detected and undetected cases at their reporting date (green). The reporting delay of  
446 undetected cases is adjusted to be the same as that of the reported cases. The dashed vertical  
447 lines represent the implementation of level 2 and level 3 restrictions in May and June. Level 2  
448 restrictions were started on May 11 and lasted until June 8, whereas level 3 restrictions were  
449 started on May 19 and lasted until May 28. **(B)** Daily number of deaths, plotted separately for  
450 detected deaths at their reporting time following case confirmation (red), ) late-detected cases  
451 at adjusted reporting time (dark green) and late-detected cases at their late reporting time (blue).  
452 Dots represent daily numbers. Solid lines represent moving averages using a 5-day sliding  
453 window, centered at day 3 (except dark green line in (B)).

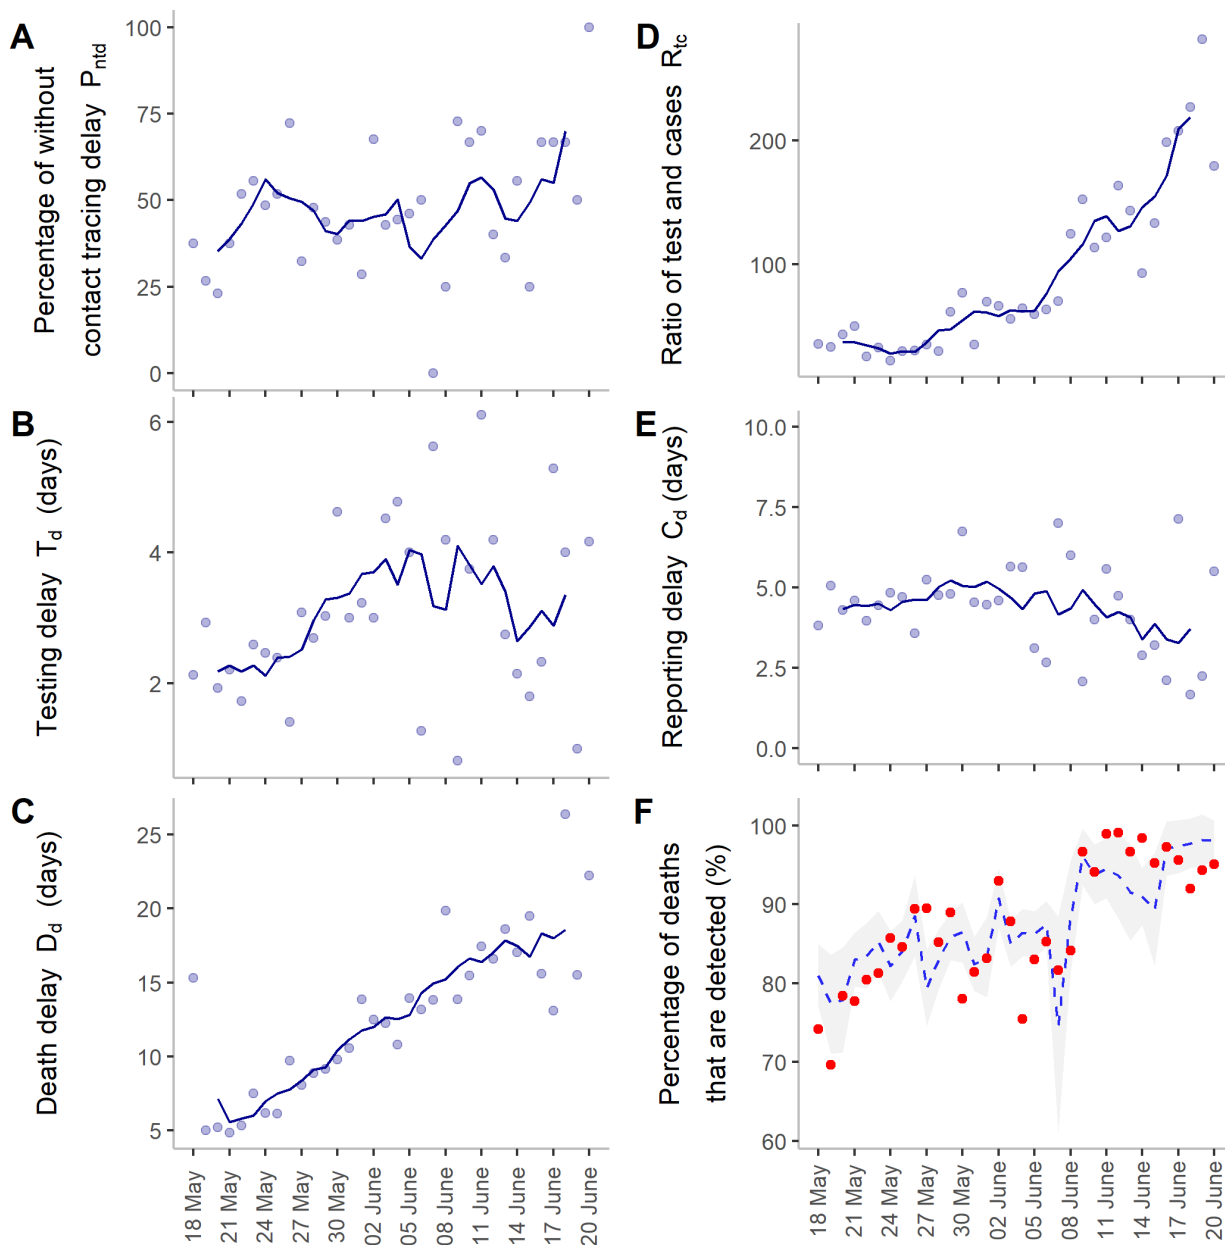

454  
 455 Figure 4. Candidate predictors that influence detected deaths. Dots in each plot represent  
 456 observed values, whereas solid lines show moving averages using a 5-day sliding window,  
 457 centered at day 3. **(A)** Percentage of cases without contact tracing delay was defined as the  
 458 proportion of cases that were tested (the first test) earlier or on the same day as symptom onset.  
 459 **(B)** Testing delay is the time delay between symptom onset and the final test. It was estimated  
 460 by subtracting these two time points. **(C)** Death delay was defined as the difference between  
 461 the time of death and symptom onset. **(D)** Ratio of tests to cases was calculated as the daily  
 462 number of tests divided by the daily number of reported cases. **(E)** Reporting delay refers to  
 463 the time delay between symptom onset and reporting. **(F)** Percentage of deaths that are detected  
 464 using adjusted reported data and model prediction. Red circles represent the adjusted reported  
 465 data. The blue dashed line represents the prediction results using the best fitting model. The  
 466 gray shaded area represents forecasted values of the proportion of detection.

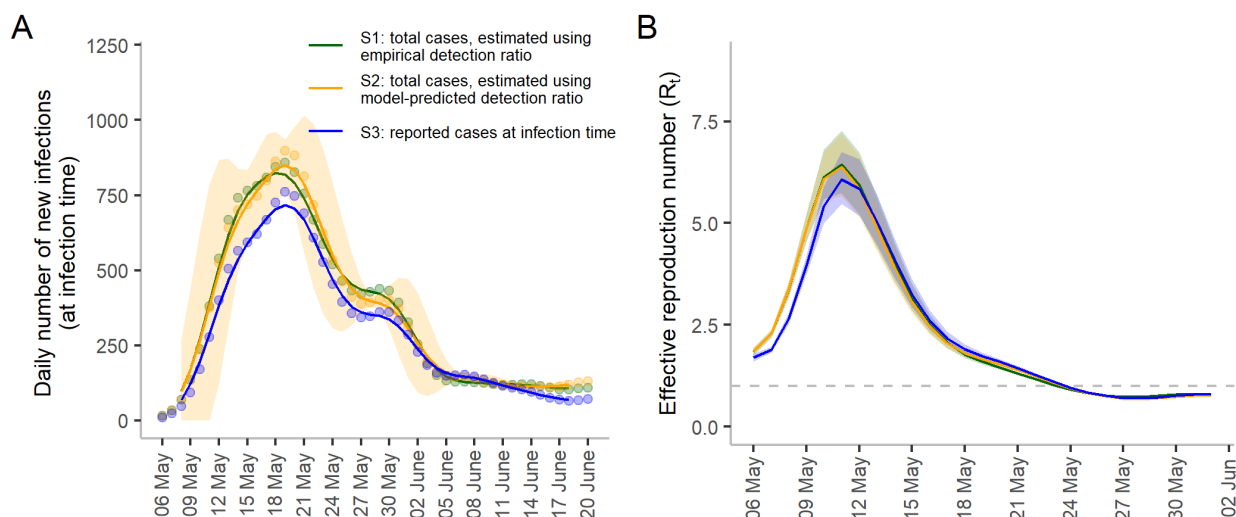

467  
468 Figure 5. The daily number of new infections and instantaneous reproduction numbers. (A)  
469 The daily number of new infections was back-projected from the daily number of cases  
470 obtained from the detected and empirically estimated undetected cases (green dots; referred to  
471 as S1). The daily number of new infections obtained from the detected and model-predicted  
472 undetected cases were plotted (dark yellow dots; referred to as S2). The daily number of  
473 reported cases at their back-projected infection time (blue dots; referred to as S3). The daily  
474 numbers of new infections were back-projected from the original reported cases to virus  
475 exposure time. The lines represent moving averages using a 5-day sliding window, centered at  
476 day 3. The shaded area represents the 95% confidence interval for total cases estimated using  
477 the model-predicted detection ratio. Daily number of new detected (reported) cases at their  
478 reporting time (red dots; referred to as S4) is presented in Figure S2. (B) Effective reproduction  
479 number estimated from (A). Lines represent the estimated values and shaded regions represent  
480 the 95% confidence intervals. The dashed line depicts the cutoff value when  $R_t = 1$ . The full  
481 view of the effective reproduction number ( $R_t$ ) for the entire period between May 6 and June  
482 20 is given in Figure S4. Color codes represent the same definition as in (A). The shaded area  
483 represents 95% confidence intervals.

484

485 Table 1. Candidate models used to choose the best model.  $\alpha$  and  $\beta$ s are model coefficients,  
486 whereas the proportion of contact tracing delay ( $P_{ntd}$ ), the ratio of the number of tests  
487 conducted and reported cases ( $R_{tc}$ ), the delay in testing ( $T_d$ ), the delay in reporting ( $C_d$ ), and  
488 the delay in deaths ( $D_d$ ) are predictors. AIC represents the Akaike information criterion.

| Models | Description                                                                           | AIC         |
|--------|---------------------------------------------------------------------------------------|-------------|
| 1      | $\alpha + \beta_1 R_{tc}$                                                             | 95.9        |
| 2      | $\alpha + \beta_1 R_{tc} + \beta_2 P_{ntd}$                                           | <b>91.0</b> |
| 3      | $\alpha + \beta_1 R_{tc} + \beta_2 P_{ntd} + \beta_3 C_d$                             | 93.0        |
| 4      | $\alpha + \beta_1 R_{tc} + \beta_2 P_{ntd} + \beta_3 C_d + \beta_4 T_d$               | 95.0        |
| 5      | $\alpha + \beta_1 R_{tc} + \beta_2 P_{ntd} + \beta_3 C_d + \beta_4 T_d + \beta_5 D_d$ | 96.9        |

489

490



491

492 Table 2. Parameter estimates of the best-fitting model (Model 2)

| Covariates                                                        | Estimates | 95% Confidence intervals | p-value |
|-------------------------------------------------------------------|-----------|--------------------------|---------|
| Ratio of number of tests conducted to reported cases ( $R_{tc}$ ) | 0.009     | 0.002-0.018              | 0.0180  |
| Proportion of cases without tracing delay ( $P_{ntd}$ )           | 1.834     | 0.316-3.375              | 0.0185  |

493

494

495 **Supplementary Materials**

496 ***Establishing the relationship between mobility and effective reproduction number***

497 Daily mobility data were obtained from Google mobility report <sup>26</sup> and were normalized after  
498 setting the mobility index on May 11 (first day of the start of the outbreak) as 1 and the value  
499 -100 as 0. The normalized mobility index ranged between 0 and 1, where higher values  
500 represent greater mobility. To compare and validate the estimated  $R_t$ , we used a generalized  
501 linear model for Gaussian distribution with identity link function. Mobility index was adjusted  
502 in the model using the following formula adopted from a recent study <sup>8</sup>:

503 
$$\log(R_t) = \log(R_0) + \beta(1 - M_b(t)). \quad (8)$$

504 where  $R_0$  is the initial reproduction number obtained from  $R_t$  at the start of the outbreak (May  
505 11, 2021), which gave the maximum number of  $R_t$ ;  $M_b(t)$  represents the daily normalized  
506 mobility index; and  $\beta$  is the regression coefficient.

507 **Supplementary figures**

508

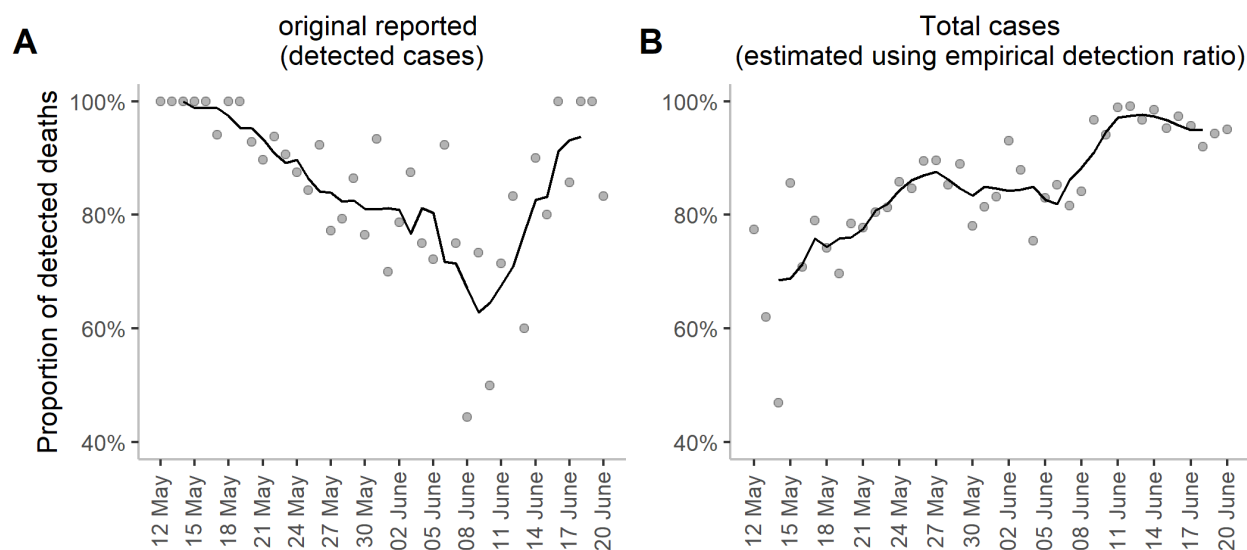

509  
510

511 Figure S1. **(A)** Proportion of detected deaths among total reported deaths. **(B)** Proportion of  
512 detected deaths among total deaths estimated using the empirical detection ratio. In each plot,  
513 dots represent daily numbers that are observed or estimated. Solid lines represent moving  
514 average using a 5-day sliding window, centered at day 3.

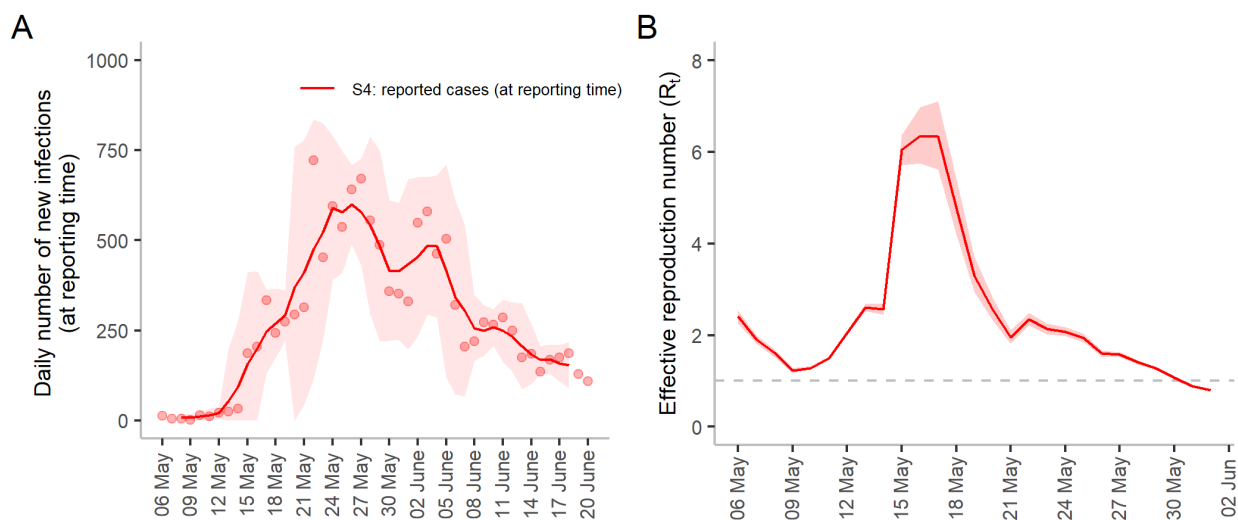

515  
516

517 Figure S2. **(A)** Daily number of new infections at their reporting time. Daily values are  
518 indicated by red dots (referred to as S4 in Methods). The line represents moving averages using  
519 a 5-day sliding window, centered at day 3. **(B)** Effective reproduction number estimated from  
520 (A). The solid red line represents estimated values. The shaded area represents 95% confidence  
521 intervals. The dashed line depicts the cutoff value when  $R_t = 1$ . The value  $R_t$  during the entire  
522 period (between May 6 and June 20) is given in the Supplementary Figure S4D.

523

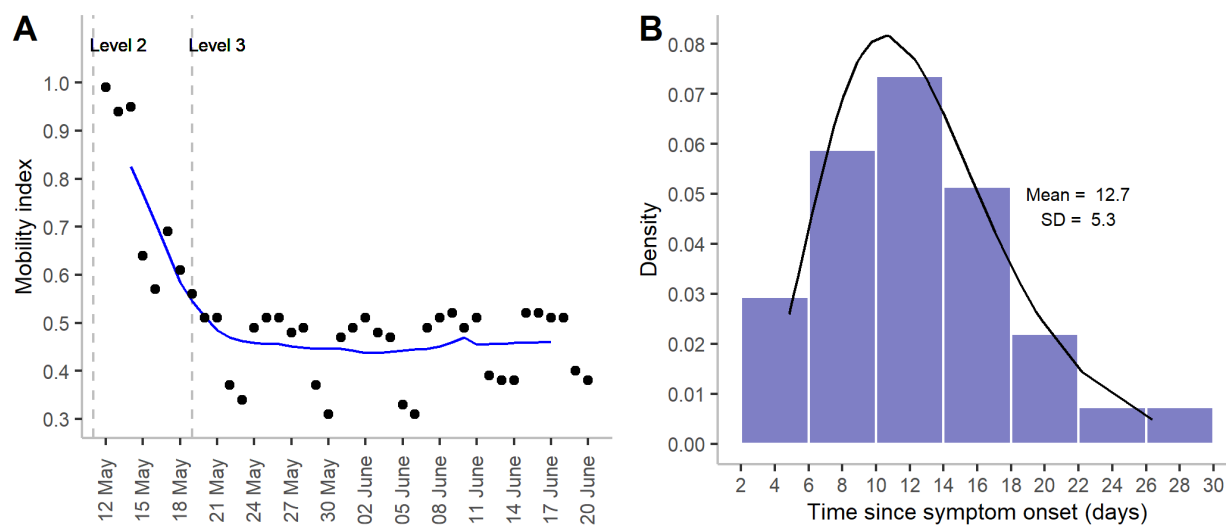

524

525

526 Figure S3. **(A)** Mobility index during the outbreak. The smooth line shows a 7-day moving  
527 average, whereas the dots represent the observed mobility index. The vertical dashed lines  
528 represent the implementation of level 2 and level 3 restrictions in May and June. Level 2  
529 restrictions were started on May 11 and lasted until June 8, whereas level 3 restrictions were  
530 imposed for the duration between May 19 and May 28. **(B)** Distribution of death delay. The  
531 bars represent the observed frequency of delay distribution and line represents the fitted line  
532 for gamma distribution with mean and standard deviation 12.7 and 5.3 days, respectively.

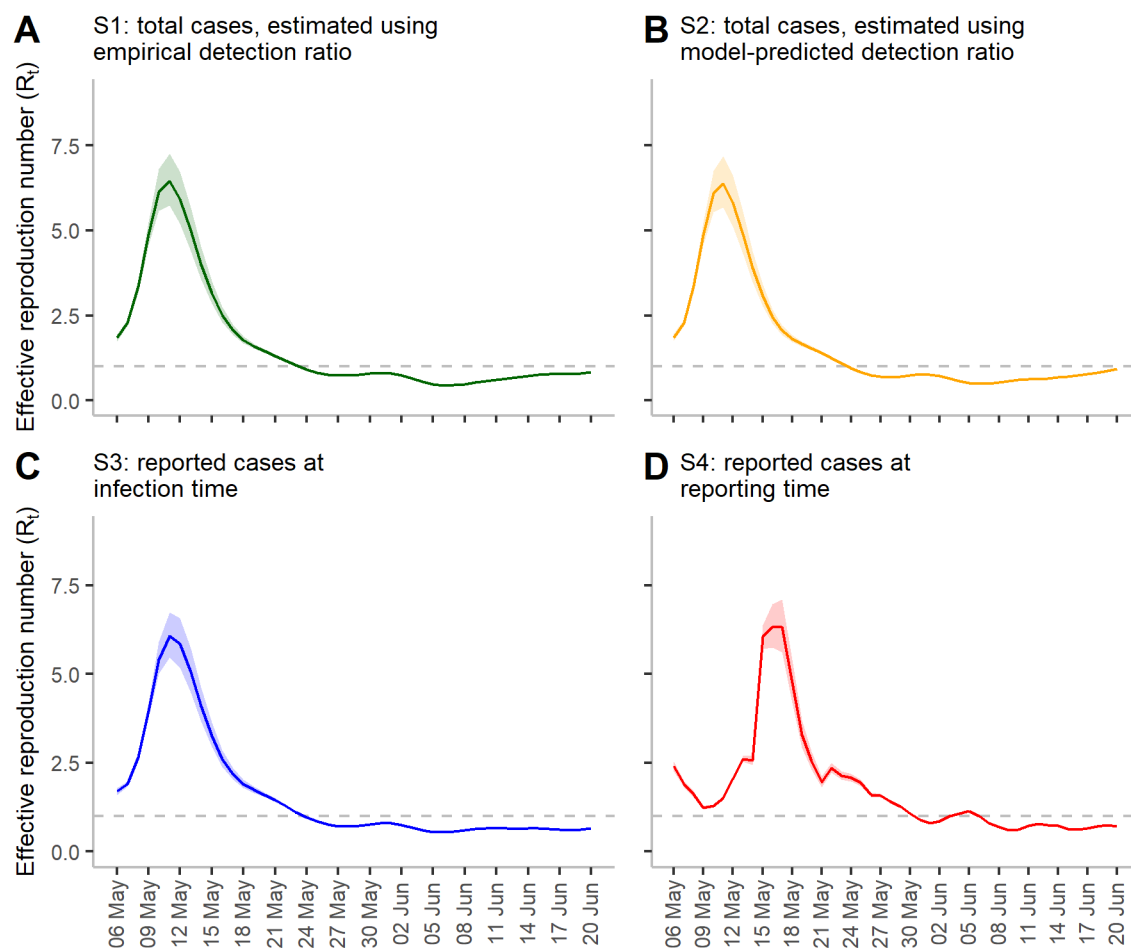

533

534 Figure S4. Effective reproduction number  $R_t$  during the entire period between May 6 and June  
535 20. S1 and S2 refer to the numbers of total cases at infection time. S3 and S4 refer to the  
536 numbers of reported cases at infection and reporting time, respectively. Smooth solid lines  
537 represent the estimated mean  $R_t$ , and shaded regions show the 95% confidence intervals. The  
538 dashed line depicts the cutoff value when  $R_t = 1$ .

539 **Supplementary tables**

540

541 Table S1. Validation of the estimates of instantaneous reproduction number using mobility  
 542 adjusted regression model between May 11 and May 24 when  $R_t$  reached one. The moving  
 543 average of mobility using a 7-day sliding window, centered at day 4, was considered as the  
 544 predictor. AIC represents the Akaike information criterion.  $\Delta AIC$  shows the differences  
 545 between the smallest AIC and AIC of the  $i$ th model. We rechecked the values for an extended  
 546 period until May 27, when  $R_t$  reached a minimum. In this case,  $R_t$ , estimated under scenario  
 547 S1, showed the best fit of the mobility data with minimum AIC -27.93 (data is not presented  
 548 in this table), whereas scenario S2 was treated as the second-best with AIC -27.20. The  
 549 difference between the AIC of these two scenarios was less than one.

| Date              | Type of data $R_t$ estimated from                                   | Validation window<br>11 May- 24 May |              |
|-------------------|---------------------------------------------------------------------|-------------------------------------|--------------|
|                   |                                                                     | AIC                                 | $\Delta AIC$ |
| At infection time | S1: Total cases estimated using the empirical detection ratio       | <b>-27.93</b>                       | <b>0.00</b>  |
|                   | S2: Total cases estimated using the model-predicted detection ratio | -27.20                              | 0.73         |
|                   | S3: Reported cases                                                  | -21.70                              | 6.23         |
| At reporting time | S4: Reported cases                                                  | 27.56                               | 55.49        |

550
